# Supplementary material for: Mental health and well-being from childhood to adulthood: design, methods and results of the 11-year follow-up of the BELLA study
Source: Springer Nature journal article supplement (doi:10.1007/s00787-020-01630-4), 2020-09-12
Supplement: MOESM1 [file 18372772]

# Supplementary Material

## File 1

### **Mental health and well-being from childhood to adulthood: Design, methods and results of the 11-year follow-up of the BELLA study**

Journal: Journal of European Child and Adolescent Psychiatry

Authors: Christiane Otto\*, Franziska Reiss\*, Catharina Voss, Anne Wüstner, Ann-Katrin Meyrose, Heike Hölling & Ulrike Ravens-Sieberer

\*both authors contributed equally to this manuscript (shared first authorship)

Corresponding author: Ulrike Ravens-Sieberer, Department of Child and Adolescent Psychiatry, Psychotherapy, and Psychosomatics, University Medical Center Hamburg-Eppendorf, Martinistr. 52, 20246 Hamburg, Germany, E-mail: raven-sieberer@uke.de

**Supplementary Table S1** Age of participants at the measurement points of the BELLA study

| Age of participants | BELLA baseline cohort |                              |                              |                              |                               | New participants (included at the 6-year follow-up) |                               | New participants (11-year follow-up) |
|---------------------|-----------------------|------------------------------|------------------------------|------------------------------|-------------------------------|-----------------------------------------------------|-------------------------------|--------------------------------------|
|                     | Baseline (2002-2006)  | 1-year follow-up (2004-2007) | 2-year follow-up (2005-2008) | 6-year follow-up (2009-2012) | 11-year follow-up (2014-2017) | 6-year follow-up (2009-2012)                        | 11-year follow-up (2014-2017) | 11-year follow-up (2014-2017)        |
| 3 years             |                       |                              |                              |                              |                               | 47                                                  |                               |                                      |
| 4 years             |                       |                              |                              |                              |                               | 128                                                 |                               |                                      |
| 5 years             |                       |                              |                              |                              |                               | 152                                                 |                               |                                      |
| 6 years             |                       |                              |                              |                              |                               | 202                                                 |                               |                                      |
| 7 years             | 268                   |                              |                              |                              |                               | 256                                                 | 1                             | 51                                   |
| 8 years             | 283                   | 234                          |                              |                              |                               | 197                                                 | 3                             | 112                                  |
| 9 years             | 287                   | 249                          | 206                          |                              |                               | 187                                                 | 9                             | 144                                  |
| 10 years            | 291                   | 250                          | 231                          |                              |                               | 151                                                 | 9                             | 135                                  |
| 11 years            | 265                   | 250                          | 240                          |                              |                               | 110                                                 | 82                            | 165                                  |
| 12 years            | 252                   | 212                          | 225                          |                              |                               | 110                                                 | 113                           | 168                                  |
| 13 years            | 261                   | 219                          | 181                          | 28                           |                               | 91                                                  | 121                           | 181                                  |
| 14 years            | 221                   | 227                          | 207                          | 117                          |                               | 91                                                  | 126                           | 172                                  |
| 15 years            | 266                   | 183                          | 208                          | 167                          |                               | 88                                                  | 75                            | 146                                  |
| 16 years            | 243                   | 220                          | 167                          | 166                          |                               | 67                                                  | 60                            | 133                                  |
| 17 years            | 226                   | 191                          | 192                          | 130                          | 3                             | 61                                                  | 58                            | 144                                  |
| 18 years            |                       | 188                          | 158                          | 159                          | 65                            | 72                                                  | 54                            | 27                                   |
| 19 years            |                       |                              | 175                          | 111                          | 85                            | 66                                                  | 38                            | 2                                    |
| 20 years            |                       |                              |                              | 127                          | 100                           | 73                                                  | 35                            |                                      |
| 21 years            |                       |                              |                              | 95                           | 109                           | 68                                                  | 24                            |                                      |
| 22 years            |                       |                              |                              | 105                          | 82                            | 56                                                  | 29                            |                                      |
| 23 years            |                       |                              |                              | 224                          | 91                            | 138                                                 | 40                            |                                      |
| 24 years            |                       |                              |                              |                              | 90                            |                                                     | 39                            |                                      |
| 25 years            |                       |                              |                              |                              | 81                            |                                                     | 40                            |                                      |
| 26 years            |                       |                              |                              |                              | 78                            |                                                     | 20                            |                                      |
| 27 years            |                       |                              |                              |                              | 62                            |                                                     | 30                            |                                      |
| 28 years            |                       |                              |                              |                              | 71                            |                                                     | 27                            |                                      |
| 29 years            |                       |                              |                              |                              | 37                            |                                                     | 12                            |                                      |
| 30 years            |                       |                              |                              |                              | 15                            |                                                     | 4                             |                                      |
| 31 years            |                       |                              |                              |                              | 4                             |                                                     | 1                             |                                      |
| <b>Total</b>        | <b>2,863</b>          | <b>2,423</b>                 | <b>2,190</b>                 | <b>1,429</b>                 | <b>973</b>                    | <b>2,411</b>                                        | <b>1,050</b>                  | <b>1,580</b>                         |

**Supplementary Table S2** Measurements used at the measurement points of the BELLA study

| Construct                             | Standardised measures/specific items                                                                                   | Baseline | 1-year follow-up | 2-year follow-up | 6-year follow-up | 11-year follow-up |
|---------------------------------------|------------------------------------------------------------------------------------------------------------------------|----------|------------------|------------------|------------------|-------------------|
| <b>Socio-demographic Variables</b>    |                                                                                                                        |          |                  |                  |                  |                   |
| Gender                                | single item                                                                                                            | ✓        | ✓                | ✓                | ✓                | ✓                 |
| Age                                   | single item                                                                                                            | ✓        | ✓                | ✓                | ✓                | ✓                 |
| Socio-economic status                 | Winkler-Index <sup>1</sup>                                                                                             | ✓        | -                | -                | -                | -                 |
|                                       | Revised SES Index <sup>2</sup>                                                                                         | -        | -                | -                | ✓                | ✓                 |
| <b>Mental Health Problems</b>         |                                                                                                                        |          |                  |                  |                  |                   |
| General mental health problems        | SDQ                                                                                                                    | ✓        | ✓                | ✓                | ✓                | ✓                 |
| Anxiety                               | SCARED                                                                                                                 | ✓        | ✓                | ✓                | ✓                | -                 |
|                                       | PHQ-Screener                                                                                                           | -        | -                | -                | ✓                | ✓                 |
|                                       | Selected items of the FBB-ANG assessing Anxiety disorders (from the DISYPS-KJ)                                         | -        | -                | ✓                | -                | -                 |
| Depression                            | CES-DC                                                                                                                 | ✓        | ✓                | ✓                | ✓                | ✓                 |
|                                       | ADS                                                                                                                    | -        | -                | -                | -                | ✓                 |
|                                       | DIKJ                                                                                                                   | ✓        | ✓                | ✓                | -                | -                 |
|                                       | PHQ-8                                                                                                                  | -        | -                | -                | ✓                | ✓                 |
|                                       | Selected items of the FBB-DES assessing Depressive disorders (from the DISYPS-KJ)                                      | -        | -                | ✓                | -                | -                 |
|                                       | PROMIS-Depression (short form)                                                                                         | -        | -                | -                | -                | ✓                 |
| Conduct Disorder                      | CBCL                                                                                                                   | ✓        | ✓                | ✓                | ✓                | -                 |
| ADHD                                  | CRS-R                                                                                                                  | ✓        | ✓                | ✓                | ✓                | -                 |
|                                       | FBB-HKS assessing Hyperkinetic disorders (from the DISYPS-KJ)                                                          | ✓        | ✓                | ✓                | -                | -                 |
| Eating Disorders                      | Body weight in kilograms and height in meter for calculating the Body Mass Index (BMI)                                 | ✓        | ✓                | ✓                | ✓                | ✓                 |
| <b>Mental Disorders</b>               |                                                                                                                        |          |                  |                  |                  |                   |
|                                       | SCOFF                                                                                                                  | ✓        | ✓                | ✓                | ✓                | ✓                 |
|                                       | Confirmed diagnosis of mental health problems by physician.                                                            | ✓        | ✓                | ✓                | ✓                | ✓                 |
|                                       | DIPS for Anxiety Disorders, Affective Disorders, Conduct Disorders, ADHD, Eating Disorders, Substance abuse/addiction. | -        | -                | -                | ✓                | -                 |
|                                       | CID-S                                                                                                                  | -        | -                | -                | ✓                | ✓                 |
| <b>Health-related Quality of Life</b> |                                                                                                                        |          |                  |                  |                  |                   |
|                                       | Kids-CAT                                                                                                               | -        | -                | -                | -                | ✓                 |
|                                       | KIDSCREEN                                                                                                              | ✓        | ✓                | ✓                | ✓                | ✓                 |
|                                       | KINDL-R                                                                                                                | ✓        | ✓                | ✓                | ✓                | -                 |
|                                       | SF-12                                                                                                                  | -        | -                | -                | -                | ✓                 |
|                                       | SF-36                                                                                                                  | -        | -                | -                | ✓                | ✓                 |
|                                       | PROMIS-Subjective well-being                                                                                           | -        | -                | -                | -                | ✓                 |
|                                       | PROMIS-Family well-being                                                                                               | -        | -                | -                | -                | ✓                 |

|                                |                                                                                                                                                                |   |   |   |   |   |
|--------------------------------|----------------------------------------------------------------------------------------------------------------------------------------------------------------|---|---|---|---|---|
|                                | PROMIS-Physical activity                                                                                                                                       | - | - | - | - | ✓ |
|                                | PROMIS-Relations with peers                                                                                                                                    | - | - | - | - | ✓ |
|                                | PROMIS-General health                                                                                                                                          | - | - | - | - | ✓ |
|                                | PROMIS-Profile 29                                                                                                                                              | - | - | - | - | ✓ |
| <b>Risk factors</b>            |                                                                                                                                                                |   |   |   |   |   |
| Parental psychopathology       | SCL-S-9                                                                                                                                                        | ✓ | ✓ | ✓ | ✓ | - |
| Parental quality of life       | SF-12                                                                                                                                                          | ✓ | ✓ | ✓ | ✓ | - |
| Parental strain                | Items assessing the burden caused by housekeeping, being a single parent, tending a family member in need of care, job-related problems, or financial problems | ✓ | - | - | ✓ | ✓ |
| Risk-Index                     | Items assessing family conflicts, harmony in partnership, unemployment, parental chronic diseases, unwanted pregnancy, parental alcohol consumption            | ✓ | ✓ | ✓ | ✓ | - |
| Life events                    | Items assessing serious illness or accident, death of a close person, marriage or new partnership, change of school                                            | - | ✓ | ✓ | ✓ | ✓ |
| <b>Protective factors</b>      |                                                                                                                                                                |   |   |   |   |   |
| Self-efficacy                  | GSE                                                                                                                                                            | ✓ | ✓ | ✓ | ✓ | ✓ |
| Self-concept                   | SPPC                                                                                                                                                           | ✓ | ✓ | ✓ | - | - |
|                                | Selected items of the CHIP-AE                                                                                                                                  | ✓ | - | - | - | - |
| Coping                         | ACOPE, ECOPE                                                                                                                                                   | - | ✓ | ✓ | ✓ | - |
| Optimism                       | BFW, CSOS                                                                                                                                                      | ✓ | ✓ | ✓ | ✓ | ✓ |
| Family climate                 | FCS                                                                                                                                                            | ✓ | ✓ | ✓ | ✓ | ✓ |
| Parental support               | 8 items from the HBSC                                                                                                                                          | ✓ | ✓ | ✓ | ✓ | - |
| Social support                 | 8 selected age-appropriate items from the German SSS                                                                                                           | ✓ | ✓ | ✓ | ✓ | ✓ |
| Peer competence                | 5 items from the HBSC                                                                                                                                          | ✓ | ✓ | ✓ | ✓ | - |
| School climate                 | 5 items from the HBSC                                                                                                                                          | ✓ | ✓ | ✓ | ✓ | - |
| <b>Health care utilisation</b> |                                                                                                                                                                |   |   |   |   |   |
|                                | Items assessing use (and frequency of use) of health care utilisation by professionals, e.g. psychiatrist or psychologist                                      | ✓ | ✓ | ✓ | ✓ | ✓ |
|                                | Items assessing paths of mental health care utilisation                                                                                                        | - | - | - | ✓ | - |
|                                | Items assessing knowledge of mental health care provision                                                                                                      | - | - | - | ✓ | ✓ |
|                                | Items assessing satisfaction with health care services                                                                                                         | - | - | - | ✓ | ✓ |
|                                | Items assessing barriers towards mental health care utilisation                                                                                                | - | - | - | ✓ | ✓ |

<sup>1</sup> by Winkler & Stolzenberg [1]; <sup>2</sup> by Lampert et al. [2, 3]

*Note.* Explanations of abbreviations and references are presented at the end of this file.

## List of abbreviations

|              |                                                                                                                                                                                                                                                                 |
|--------------|-----------------------------------------------------------------------------------------------------------------------------------------------------------------------------------------------------------------------------------------------------------------|
| ACOPE        | Problem-focused Coping [Problemorientiertes, aktives Coping] [4]                                                                                                                                                                                                |
| ADHS         | Attention deficit hyperactivity disorder                                                                                                                                                                                                                        |
| BFW          | Berner Questionnaire on Adolescents' Subjective Well-Being [Berner Fragebogen für Wohlbefinden] [5]                                                                                                                                                             |
| CBCL         | Child Behavior Checklist [6]; German version by Arbeitsgruppe Deutsche Child Behavior Checklist [7]                                                                                                                                                             |
| CES-DC       | Center for Epidemiological Studies Depression Scale for Children [8]; German version by Barkmann et al. [9]                                                                                                                                                     |
| CHIP-AE      | Child Health and Illness Profile-Adolescent Edition [10]                                                                                                                                                                                                        |
| CID-S        | Composite International Diagnostic Screener [11]                                                                                                                                                                                                                |
| CRS-R        | Conners' Rating Scales-Revised [12]; German version by Erhart, Döpfner [13]                                                                                                                                                                                     |
| CSOS         | Children's Sense of Coherence Scale [14]; German version by Kern [15]                                                                                                                                                                                           |
| DIKJ         | Depression Inventory for Children and Adolescents [Depressions-Inventar für Kinder und Jugendliche] [16, 17]                                                                                                                                                    |
| DIPS         | Diagnostic Interview for Mental Disorders in Children and Adolescents [Diagnostisches Interview bei psychischen Störungen im Kindes- und Jugendalter] [18, 19]                                                                                                  |
| DISYPS-KJ    | Diagnostic System for Mental Disorders in Childhood and Adolescence [Diagnostik-System für psychische Störungen im Kindes- und Jugendalter] [20]                                                                                                                |
| ECOPE        | Emotion-focused Coping [Emotionsorientiertes, vermeidendes Coping] [21]                                                                                                                                                                                         |
| FBB-ANG      | Proxy-questionnaire for Anxiety disorders [Fremdbeurteilungsbogen für Angststörungen] from the Diagnostic System for Mental Disorders in Childhood and Adolescence [Diagnostik-System für psychische Störungen im Kindes- und Jugendalter] [20]                 |
| FBB-DES      | Proxy-questionnaire for Depressive disorders [Fremdbeurteilungsbogen für Depressive Störungen] ) from the Diagnostic System for Mental Disorders in Childhood and Adolescence [Diagnostik-System für psychische Störungen im Kindes- und Jugendalter] [20]      |
| FBB-HKS      | Proxy-questionnaire for Hyperkinetic disorders [Fremdbeurteilungsbogen für hyperkinetische Störungen] from the Diagnostic System for Mental Disorders in Childhood and Adolescence [Diagnostik-System für psychische Störungen im Kindes- und Jugendalter] [20] |
| FCS          | Family Climate Scale [22], which is the German adaptation of the Family Environmental Scale [23, 24]                                                                                                                                                            |
| GSE          | General Self-Efficacy Scale [25]; German version by Bäßler and Schwarzer [21]                                                                                                                                                                                   |
| HBSC         | Health Behaviour in School-aged Children survey [26]                                                                                                                                                                                                            |
| KIDS-CAT     | Kids-Computer-Adaptive Test [27]                                                                                                                                                                                                                                |
| KIDSCREEN    | Quality of Life Questionnaire for Children and Adolescents [28]                                                                                                                                                                                                 |
| KINDL-R      | Questionnaire to assess Health-related Quality of Life in Children and Adolescents – Revised version [29]                                                                                                                                                       |
| PHQ-8        | Patient Health Questionnaire-8 [30]; German version by Löwe, Spitzer [31] and Gräfe, Zipfel [32]                                                                                                                                                                |
| PHQ-Screener | Patient Health Questionnaire-Screener for Panic Syndrom [33]; German version by Löwe, Spitzer [31] and Gräfe, Zipfel [32]                                                                                                                                       |
| PROMIS       | Patient-Reported Outcomes Measurement Information System [34, 35]                                                                                                                                                                                               |
| SCARED       | Screen for Child Anxiety Related Emotional Disorders [36, 37]; German version by Plass, Barkmann [38]                                                                                                                                                           |
| SCL-S-9      | Symptom-Checklist Shortversion-9 [39]                                                                                                                                                                                                                           |
| SCOFF        | SCOFF Questionnaire [40], German version by Hölling and Schlack [41]                                                                                                                                                                                            |
| SDQ          | Strengths and Difficulties Questionnaire [42] & Impact Supplement [43]                                                                                                                                                                                          |
| SES          | socio-economic status (parental education, occupational qualification, occupational position, income)                                                                                                                                                           |
| SF-12        | Short Form-12 Health Survey [44]; German version by Bullinger and Kirchberger [45]                                                                                                                                                                              |
| SF-36        | Short Form-36 Health Survey [46]; German version by Bullinger and Kirchberger [45]                                                                                                                                                                              |
| SPPC         | Self-Perception Profile for Children [47]; German version by Asendorpf and Aken [48]                                                                                                                                                                            |
| SSS          | Social Support Scale [49]                                                                                                                                                                                                                                       |

## Supplementary References

1. Winkler, J. and H. Stolzenberg, [Social class index in the Federal Health Survey]. *Gesundheitswesen*, 1999. 61 Spec No: p. S178-83.
2. Lampert, T., et al., Messung des sozioökonomischen Status in der Studie zur Gesundheit Erwachsener in Deutschland (DEGS1). *Bundesgesundheitsblatt Gesundheitsforschung Gesundheitsschutz*, 2013. 56(5-6): p. 631-6.
3. Lampert, T., et al., Messung des sozioökonomischen Status und des subjektiven sozialen Status in KiGGS Welle 2. *Journal of Health Monitoring*, 2018. 3(1): p. 114-133.
4. Jerusalem, M. and W. Mittag, Problemorientiertes, aktives Coping (ACOPE), in Skalen zur Erfassung von Lehrer- und Schülermerkmalen. Dokumentation der psychometrischen Verfahren im Rahmen der Wissenschaftlichen Begleitung des Modellversuchs Selbstwirksame Schulen, R. Schwarzer and M. Jerusalem, Editors. 1999, Freie Universität Berlin, Institut für Psychologie: Berlin. p. 26-27.
5. Grob, A., et al., Berner Fragebogen zum Wohlbefinden Jugendlicher (BFW). *Diagnostica*, 1991. 37(1): p. 66-75.
6. Achenbach, T.M., Manual for the Child Behavior Checklist/4-18 and 1991 profile. 1991, Burlington: University of Vermont, Department of Psychiatry.
7. Arbeitsgruppe Deutsche Child Behavior Checklist, Elternfragebogen über das Verhalten von Kindern und Jugendlichen; deutsche Bearbeitung der Child Behavior Checklist (CBCL/4-18). Einführung und Anleitung zur Handauswertung mit deutschen Normen. Vol. 2. 1998, Köln: Arbeitsgruppe Kinder-, Jugend- und Familiendiagnostik (KJFD).
8. Weissman, M.M., H. Orvaschel, and N. Padian, Children's symptom and social functioning self-report scales comparison of mothers' and children's reports. *Journal of Nervous & Mental Disease*, 1980. 168(12): p. 736-740.
9. Barkmann, C., et al., The German version of the Centre for Epidemiological Studies Depression Scale for Children: Psychometric evaluation in a population - based survey of 7 to 17 years old children and adolescents- results of the BELLA study. *European Child & Adolescent Psychiatry*, 2008. 17(1): p. 116-124.
10. Starfield, B., et al., Manual for the Child Health and Illness Profile-Adolescent Edition (CHIP-AE). 2000, Baltimore, MD: The Johns Hopkins University.
11. Wittchen, H.U., et al., Screening for mental disorders: Performance of the Composite International Diagnostic – Screener (CID-S). *Int J Methods Psychiatr Res*, 1999. 8(2): p. 59-70.
12. Lidzba, K., H. Christiansen, and R. Drechsler, Conners 3 - Conners Skalen zu Aufmerksamkeit und Verhalten 3 (Manual). 3 ed. 2013, Bern: Huber.
13. Erhart, M., M. Döpfner, and U. Ravens-Sieberer, Psychometric properties of two ADHD questionnaires: comparing the Conners' scale and the FBB-HKS in the general population of German children and adolescents- results of the BELLA study. *European Child & Adolescent Psychiatry*, 2008. 17 (Suppl. 1): p. 106-115.
14. Margalit, M. and M. Efrati, Loneliness, coherence and companionship among children with learning disorders. *Educational Psychology*, 1996. 16(1): p. 69-79.
15. Kern, R., E. Rasky, and R. Noack, Indikatoren für Gesundheitsförderung in der Volksschule. 1995, Graz: Karl-Franzens-Universität.
16. Stiensmeier-Pelster, J., M. Schürmann, and K. Duda, DIKJ- Depressions- Inventar für Kinder und Jugendliche. 2., überarbeitete und neunormierte Auflage. 2000, Göttingen: Hogrefe.
17. Stiensmeier-Pelster, J., M. Schürmann, and K. Duda, Depressions-Inventar für Kinder und Jugendliche (DIKJ). 1989, Göttingen: Hogrefe.
18. Schneider, S. and J. Margraf, DIPS: Diagnostisches Interview bei psychischen Störungen, ed. S. Schneider and J. Margraf. Vol. 4. 2011, Berlin Heidelberg: Springer.
19. Schneider, S., S. Unnewehr, and J. Margraf, Kinder-DIPS: Diagnostisches Interview bei psychischen Störungen im Kindes- und Jugendalter, ed. S. Schneider, S. Unnewehr, and J. Margraf. Vol. 2. 2009, Berlin Heidelberg: Springer.
20. Döpfner, M. and G. Lehmkuhl, Diagnostik-System für Psychische Störungen im Kindes- und Jugendalter nach ICD-10 und DSM-IV (DISYPS-KJ). 2 ed. 2000, Bern: Huber.
21. Bäßler, J. and R. Schwarzer, Emotionsorientiertes, vermeidendes Coping (ECOPE), in Skalen zur Erfassung von Lehrer- und Schülermerkmalen. Dokumentation der psychometrischen Verfahren im Rahmen der Wissenschaftlichen Begleitung des Modellversuchs Selbstwirksame Schulen, R. Schwarzer and M. Jerusalem, Editors. 1999, Freie Universität Berlin, Institut für Psychologie: Berlin. p. 27-28.
22. Schneewind, K., M. Beckmann, and A. Hecht-Jackl, Familienklima-Skalen. Bericht 8.1 und 8.2. 1985, München: Ludwig Maximilians Universität, Institut für Psychologie-Persönlichkeitspsychologie und Psychodiagnostik.

23. Moos, R.H. and B.S. Moos, Family environment scale (FES). 1974, Palo Alto, CA: Consulting Psychologists Press.
24. Moos, R.H. and B.S. Moos, Family environment scale manual and sampler set: Development, applications and research. 2009, Palo Alto, CA: Mind Garden Inc.
25. Schwarzer, R. and M. Jerusalem, Generalized Self-Efficacy Scale, in Measures in health psychology: A user's portfolio. Causal and control beliefs J. Weinman, S. Wright, and M. Johnston, Editors. 1995, NFER-NELSON: Windsor, UK. p. 35-37.
26. Currie, C., et al., Health Behaviour in School-aged Children (HBSC) study protocol: Background, methodology and mandatory items for the 2009/10 survey. 2010, Edinburgh & Vienna: CAHRU & LBIHPR.
27. Devine, J., et al., A new computerized adaptive test advancing the measurement of health-related quality of life (HRQoL) in children: the Kids-CAT. *Quality of Life Research Journal*, 2015. 24(4): p. 871-84.
28. Ravens-Sieberer, U. and t.E.K. Group, The KIDSCREEN Questionnaires - Quality of life questionnaires for children and adolescents – Handbook. 2006, Lengerich: Pabst Science Publisher.
29. Ravens-Sieberer, U. and M. Bullinger, Assessing health-related quality of life in chronically ill children with the German KINDL: First psychometric and content analytical results. *Quality of Life Research*, 1998. 7(5): p. 399-407.
30. Kroenke, K. and R.L. Spitzer, The PHQ-9: A new depression diagnostic and severity measure. *Psychiatric Annals*, 2002. 32(9): p. 509-515.
31. Löwe, B., et al., Gesundheitsfragebogen für Patienten (PHQ-D). Manual-Komplettversion und Kurzform. Autorisierte deutsche Version des "Prime MD Patient Health Questionnaire (PHQ). 2002, Heidelberg: Pfizer.
32. Gräfe, K., et al., Screening psychischer Störungen mit dem "Gesundheitsfragebogen für Patienten (PHQ-D)". *Diagnostica*, 2004. 50(4): p. 171-181.
33. Spitzer, R.L., J.B. Williams, and K. Kroenke, Instruction manual: Instructions for Patient Health Questionnaire (PHQ) and GAD-7 Measures. Retrieved from <http://www.phqscreeners.com/instructions/instructions.pdf> 2013.
34. Cella, D., et al., The Patient-Reported Outcomes Measurement Information System (PROMIS) developed and tested its first wave of adult self-reported health outcome item banks: 2005-2008. *Journal of Clinical Epidemiology*, 2010. 63: p. 1179-1194.
35. Forrest, C.B., et al., Concurrent validity of the PROMIS® pediatric global health measure. *Quality of Life Research Journal*, 2016. 25(3): p. 739-51.
36. Birmaher, B., et al., The Screen for Child Anxiety Related Emotional Disorders (SCARED): Scale construction and psychometric characteristics. *Journal of the American Academy of Child and Adolescent Psychiatry*, 1997. 36(4): p. 545-553.
37. Birmaher, B., et al., Psychometric properties of the Screen for Child Anxiety Related Emotional Disorders (SCARED): A replication study. *Journal of the American Academy of Child and Adolescent Psychiatry*, 1999. 38(10): p. 1230-1236.
38. Plass, A., et al., German translation and validation of the Screen for Child Anxiety Related Emotional Disorders (SCARED) - First results., in *In Book of abstracts of the 16th World Congress of the International Association for Child and Adolescent Psychiatry and Allied Professions (IACAPAP)*. 2004: Berlin. p. 26.
39. Klaghofer, R. and E. Braehler, Konstruktion und teststatistische Prüfung einer Kurzform der SCL-90-R. *Zeitschrift für Klinische Psychologie, Psychiatrie und Psychotherapie*, 2001. 49(2): p. 115-124.
40. Morgan, J.F., F. Reid, and J.H. Lacey, The SCOFF questionnaire: Assessment of a new screening tool for eating disorders. *Bmj*, 1999. 319(1467): p. 1467-1468.
41. Hölling, H. and R. Schlack, Essstörungen im Kindes und Jugendalter - Erste Ergebnisse aus dem Kinder- und Jugendgesundheitsurvey (KiGGS). *Bundesgesundheitsblatt, Gesundheitsforschung, Gesundheitsschutz*, 2007. 50(5/6): p. 794-799.
42. Goodman, R., The Strengths and Difficulties Questionnaire: A research note. *Journal of Child Psychology and Psychiatry*, 1997. 38(5): p. 581-586.
43. Goodman, R., The extended version of the Strengths and Difficulties Questionnaire as a guide to child psychiatric caseness and consequent burden. *Journal of Child Psychology and Psychiatry*, 1999. 40(5): p. 791-799.
44. Ware, J.J., M. Kosinski, and S.D. Keller, A 12-Item Short-Form Health Survey: Construction of scales and preliminary tests of reliability and validity. *Medical care*, 1996. 34(3): p. 220-33.
45. Bullinger, M. and I. Kirchberger, SF-36 Fragebogen zum Gesundheitszustand – Handanweisung, in *Diagnostische Verfahren in der Rehabilitation*, J. Bengel, M. Wirtz, and C. Zwingmann, Editors. 1998, Hogrefe: Göttingen.
46. Ware, J.E. and C.D. Sherbourne, The MOS 36-Item Short-Form Health Survey (SF-36). *Medical Care*, 1992. 30(6): p. 473-483.

47. Harter, S., Manual for the self-perception profile for children. 1985, Denver, CO: University of Denver.
48. Asendorpf, J. and M.A.G.v. Aken, Self-Perception Profile for Children - deutsche Fassung (SPPC-D). 1993, Berlin: Humboldt-Universität, Institut für Psychologie.
49. Donald, C.A. and J.E. Ware, The measurement of social support. *Research in Community & Mental Health*, 1984. 4: p. 325-370.
