# Supplementary material for: Mental health and well-being from childhood to adulthood: design, methods and results of the 11-year follow-up of the BELLA study
Source: Springer Nature journal article supplement (doi:10.1007/s00787-020-01630-4), 2020-09-12
Supplement: MOESM2 [file 18372772]

# Supplementary Material

## File 2

### **Mental health and well-being from childhood to adulthood: Design, methods and results of the 11-year follow-up of the BELLA study**

Journal: Journal of European Child and Adolescent Psychiatry

Authors: Christiane Otto\*, Franziska Reiss\*, Catharina Voss, Anne Wüstner, Ann-Katrin Meyrose, Heike Hölling & Ulrike Ravens-Sieberer

\*both authors contributed equally to this manuscript (shared first authorship)

Corresponding author: Ulrike Ravens-Sieberer, Department of Child and Adolescent Psychiatry, Psychotherapy, and Psychosomatics, University Medical Center Hamburg-Eppendorf, Martinistr. 52, 20246 Hamburg, Germany, E-mail: raven-sieberer@uke.de

**Supplementary Table S3** Model fit of null models on self- and parent-reported general health and health-related quality of life

|                          | <b>General health</b>             |                                     | <b>Health-related quality of life</b> |                                     |
|--------------------------|-----------------------------------|-------------------------------------|---------------------------------------|-------------------------------------|
|                          | <b>Self-report</b><br>(n = 4,987) | <b>parent-report</b><br>(n = 5,754) | <b>self-report</b><br>(n = 4,293)     | <b>parent-report</b><br>(n = 4,345) |
| <i>Null model fit</i>    |                                   |                                     |                                       |                                     |
| <i>-2 Log Likelihood</i> | 22,852.13                         | 25,127.03                           | 52,031.22                             | 49,585.73                           |
| <i>df</i>                | 3                                 | 3                                   | 3                                     | 3                                   |
| <i>AIC</i>               | 22,858.13                         | 25,133.03                           | 52,037.22                             | 49,591.73                           |
| <i>BIC</i>               | 22,879.83                         | 25,154.98                           | 52,057.84                             | 49,612.20                           |

*Note:* analysed longitudinal data was gathered at five measurement points, only for parent-reported health-related quality of life no baseline data was available.

*CI = Confidence Interval; df = degrees of freedom; AIC = Akaike's Information Criterion; BIC = Schwarz's Bayesian Information Criterion.*

**Supplementary Table S4** Age- and gender-specific effects on self- and parent-reported general health and health-related quality of life over time

|                           | General health             |              |                              |              | Health-related quality of life |              |                              |              |
|---------------------------|----------------------------|--------------|------------------------------|--------------|--------------------------------|--------------|------------------------------|--------------|
|                           | Self-report<br>(n = 4,987) |              | parent-report<br>(n = 5,754) |              | self-report<br>(n = 4,293)     |              | parent-report<br>(n = 4,345) |              |
|                           | <i>b</i>                   | 95 % CI      | <i>b</i>                     | 95 % CI      | <i>b</i>                       | 95 % CI      | <i>b</i>                     | 95 % CI      |
| <i>Fixed effects</i>      |                            |              |                              |              |                                |              |                              |              |
| Intercept                 | 2.80***                    | 2.75, 2.84   | 2.87***                      | 2.83, 2.90   | 53.37***                       | 52.73, 54.02 | 53.55***                     | 53.01, 54.10 |
| <i>Level 1-predictors</i> |                            |              |                              |              |                                |              |                              |              |
| Time                      | 0.13***                    | 0.10, 0.17   | 0.09***                      | 0.06, 0.12   | 2.31***                        | 1.86, 2.77   | 0.81**                       | 0.23, 1.39   |
| Time x time               | -0.03***                   | -0.04, -0.03 | -0.03***                     | -0.04, -0.02 | -0.83***                       | -0.95, -0.71 | -0.54***                     | -0.72, -0.37 |
| Time x time x time        | 0.00***                    | 0.00, 0.00   | 0.00***                      | 0.00, 0.00   | 0.05***                        | 0.04, 0.06   | 0.05***                      | 0.03, 0.06   |
| <i>Level 2-predictors</i> |                            |              |                              |              |                                |              |                              |              |
| Age                       | -0.01**                    | -0.01, -0.00 | -0.03***                     | -0.03, -0.02 | -0.78***                       | -0.90, -0.66 | -0.27***                     | -0.36, -0.18 |
| Female                    | -0.26***                   | -0.31, -0.22 | -0.08***                     | -0.13, -0.04 | -3.01***                       | -3.78, -2.23 | -1.01**                      | -1.67, -0.35 |
| Age by female             | -0.01***                   | -0.02, -0.01 | -0.01***                     | -0.02, -0.01 | -0.11*                         | -0.22, -0.01 | -0.16***                     | -0.26, -0.07 |
| <i>Random effects</i>     |                            |              |                              |              |                                |              |                              |              |
| Residual                  | 0.36***                    | 0.34, 0.38   | 0.35***                      | 0.34, 0.36   | 48.40***                       | 45.88, 51.05 | 45.76***                     | 43.13, 48.54 |
| Intercept (subject id)    | 0.28***                    | 0.25, 0.31   | 0.32***                      | 0.29, 0.35   | 62.01***                       | 55.64, 69.10 | 63.05***                     | 57.49, 69.15 |
| Slope (time)              | 0.00***                    | 0.00, 0.00   | 0.00***                      | 0.00, 0.00   | 0.23                           | 0.08, 0.69   | 0.86***                      | 0.60, 1.24   |
| Intercept, slope          | -0.01***                   | -0.02, -0.01 | -0.02***                     | -0.02, -0.01 | -3.30***                       | -4.71, -1.90 | 0.86***                      | 0.60, 1.24   |
| <i>Model fit</i>          |                            |              |                              |              |                                |              |                              |              |
| -2 Log Likelihood         | 22,515.76                  |              | 24,850.33                    |              | 51,401.91                      |              | 49,296.58                    |              |
| df                        | 11                         |              | 11                           |              | 11                             |              | 11                           |              |
| AIC                       | 22,537.76                  |              | 24,872.33                    |              | 51,423.91                      |              | 49,318.58                    |              |
| BIC                       | 22,617.30                  |              | 24,952.84                    |              | 51,499.52                      |              | 49,393.62                    |              |

Note: analysed longitudinal data was gathered at five measurement points, only for parent-reported health-related quality of life no baseline data was available.

CI = Confidence Interval; df = degrees of freedom; AIC = Akaike's Information Criterion; BIC = Schwarz's Bayesian Information Criterion.
